# Supplementary material for: New thiocyanatocadmates templated by multi-dentate N-heterocyclic/diamine molecules
Source: Royal Society of Chemistry journal article supplement (doi:10.1039/c3dt32900c), 2013-01-01
Supplement: c3dt32900c.pdf [file c3dt32900c.pdf]

## Supporting materials

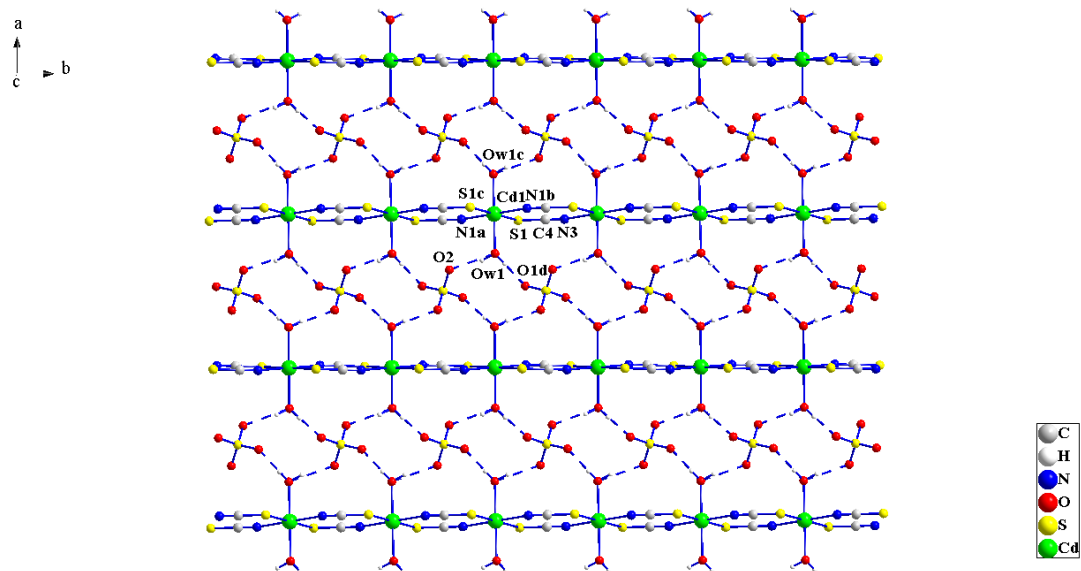

Fig. S1 The 2-D supramolecular network for  $[\text{Cd}(\text{SCN})_2(\text{H}_2\text{O})_2]\text{SO}_4^{2-}$  in compound **1**.

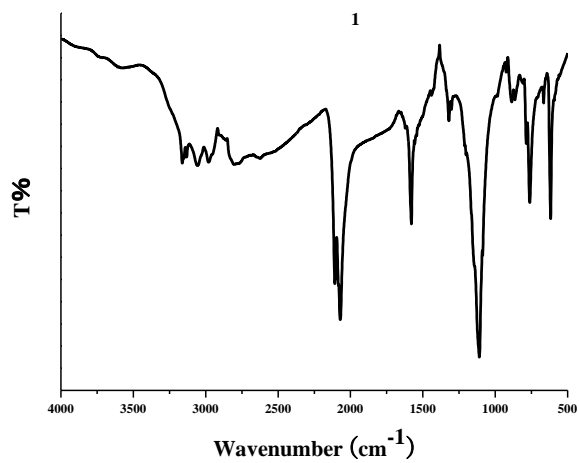

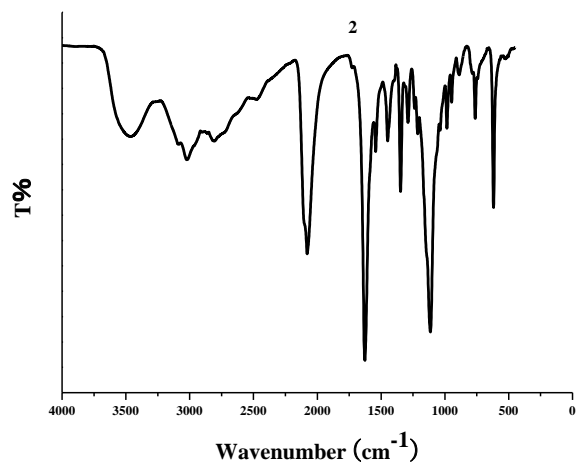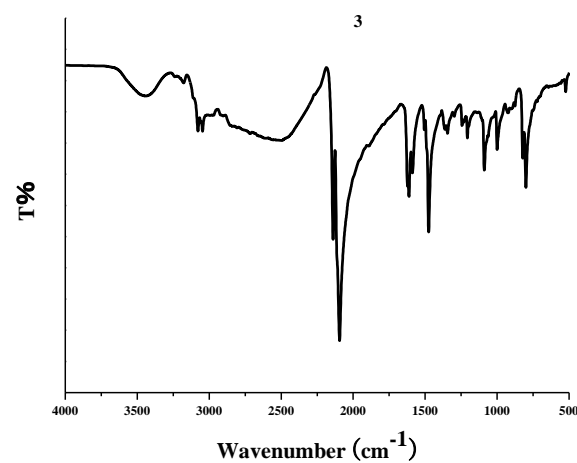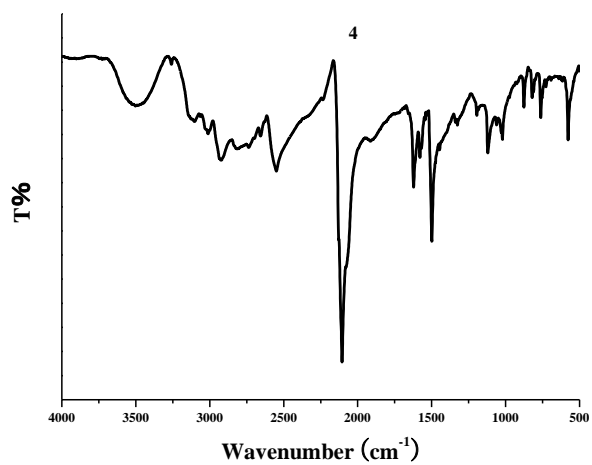

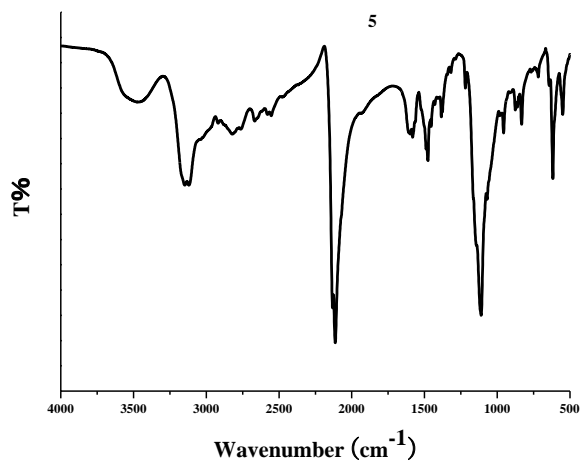

Fig. S2 The IR spectra of compounds 1-5.

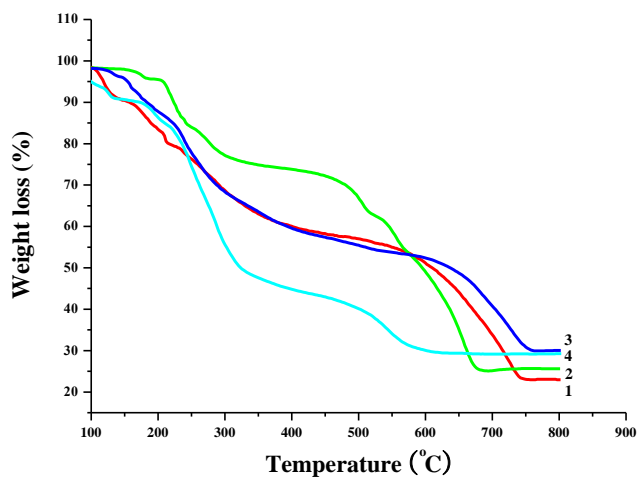

Fig. S3 The TG curves of compounds 1-4.

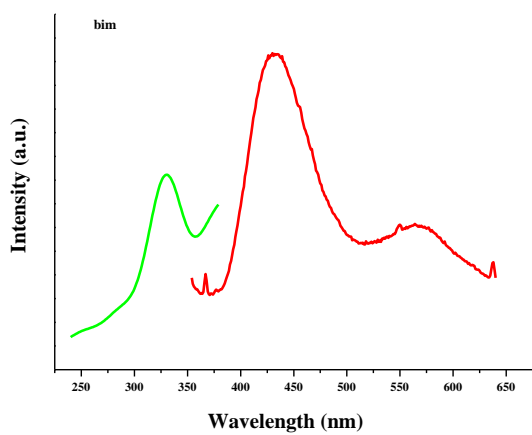

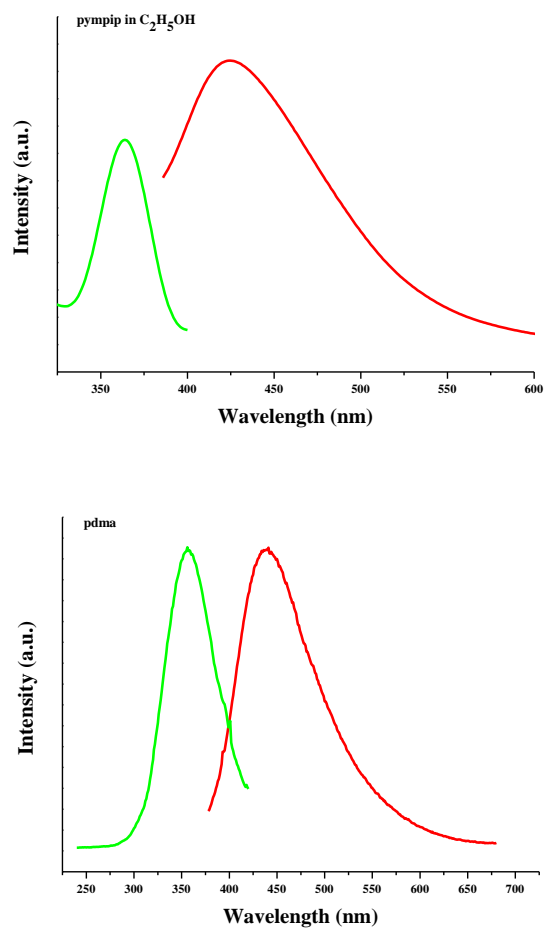

**Fig. S4** The excitation (green) and emission (red) spectra of the organic molecules in compounds **1**, **2** and **5**.
